# Supplementary material for: Host-Plant Selection Behavior of Ophraella communa, a Biocontrol Agent of the Invasive Common Ragweed Ambrosia artemisiifolia
Source: MDPI journal article supplement (doi:10.3390/insects14040334), 2023-03-29
Supplement: s1 [file s1]

**Supplementary table S1.** Three-way ANOVA of the effects of four plant species, days after release, and cages (blocks) on *Ophraella communa* distribution (adults and eggs) in outdoor cages. Pla refers to plant species, Day refers to days after release and blo refers to cages (blocks).

| Factors         | Adult |        | Egg   |        |
|-----------------|-------|--------|-------|--------|
|                 | F     | p      | F     | p      |
| Pla             | 134.1 | < 0.01 | 99.23 | < 0.01 |
| Day             | 2.186 | 0.124  | 29.91 | 0.033  |
| Blo             | 2.719 | 0.274  | 2.992 | 0.471  |
| Pla * Day       | 1.202 | 0.655  | 56.64 | 0.002  |
| Pla * Blo       | 3.839 | 0.178  | 1.593 | 0.210  |
| Day * Blo       | 2.966 | 0.357  | 1.429 | 0.863  |
| Pla * Day * Blo | 1.406 | 0.636  | 1.406 | 0.737  |

**Supplementary table S2.** Three-way ANOVA of the effects of plant species, distance from center, and ragweed cluster density on the number of *O. communa* individuals in different developmental stages on *A. artemisiifolia* and *H. annuus* planted. Pla refers to plant species, Dis refers to distance from center and Den refers to ragweed cluster density.

| Years | Factors         | Adult |        | Egg   |        | Larva  |        | Pupa  |        |
|-------|-----------------|-------|--------|-------|--------|--------|--------|-------|--------|
|       |                 | F     | p      | F     | p      | F      | p      | F     | p      |
| 2010  | Pla             | 544.8 | < 0.01 | 520.7 | < 0.01 | 1023.1 | < 0.01 | 585.1 | < 0.01 |
|       | Dis             | 0.304 | 0.738  | 2.201 | 0.117  | 1.546  | 0.219  | 0.202 | 0.817  |
|       | Den             | 0.932 | 0.398  | 0.675 | 0.512  | 0.256  | 0.775  | 1.297 | 0.279  |
|       | Pla * Dis       | 0.269 | 0.765  | 2.202 | 0.116  | 1.544  | 0.219  | 0.204 | 0.816  |
|       | Pla * Den       | 0.965 | 0.385  | 0.683 | 0.508  | 0.255  | 0.776  | 1.305 | 0.276  |
|       | Dis * Den       | 0.534 | 0.711  | 0.096 | 0.984  | 1.418  | 0.234  | 0.363 | 0.834  |
|       | Pla * Dis * Den | 0.559 | 0.693  | 0.095 | 0.984  | 1.413  | 0.236  | 0.363 | 0.834  |
| 2011  | Pla             | 520.1 | < 0.01 | 1225  | < 0.01 | 586.7  | < 0.01 | 441.4 | < 0.01 |
|       | Dis             | 1.626 | 0.202  | 1.461 | 0.237  | 0.665  | 0.517  | 0.305 | 0.738  |
|       | Den             | 0.029 | 0.972  | 0.148 | 0.863  | 0.946  | 0.392  | 1.711 | 0.186  |
|       | Pla * Dis       | 1.616 | 0.204  | 1.451 | 0.240  | 0.671  | 0.514  | 0.305 | 0.738  |
|       | Pla * Den       | 0.022 | 0.978  | 0.151 | 0.860  | 0.961  | 0.386  | 1.723 | 0.184  |
|       | Dis * Den       | 0.708 | 0.588  | 1.369 | 0.251  | 1.582  | 0.186  | 0.324 | 0.861  |
|       | Pla * Dis * Den | 0.685 | 0.604  | 1.366 | 0.252  | 1.563  | 0.191  | 0.324 | 0.861  |

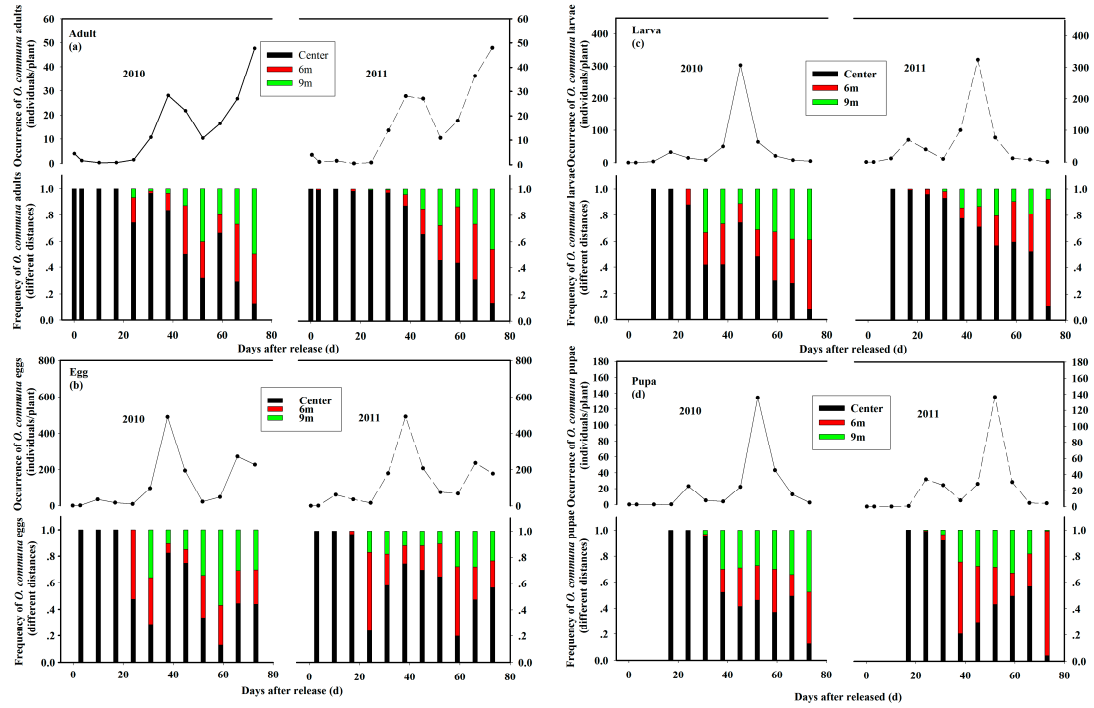

**Figure S1.** Occurrence and frequency of *Ophraella communa* individuals in different developmental stages on *A. artemisiifolia* planted at different distances. Centre indicates that *A. artemisiifolia* were planted in the center. *A. artemisiifolia* were planted in homocentric rings with a radius of 6 m and 9 m.
